# Supplementary material
Source: Springer Nature journal article supplement (https://www.springermedizin.de/resource/supplementary/12865_2013_558_MOESM8_ESM.pdf/9428216)

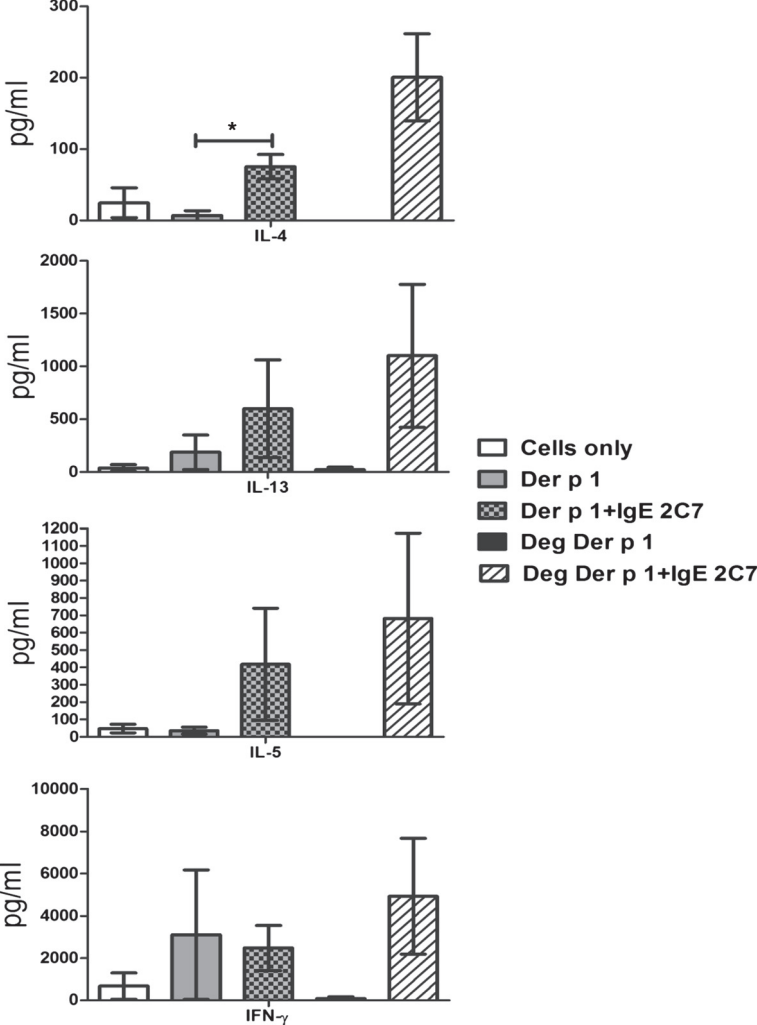

Supplement: MOESM8 [file 9428216]
